# Supplementary material for: Deep Eutectic Solvents for Improving the Solubilization and Delivery of Dapsone
Source: MDPI journal article supplement (doi:10.3390/pharmaceutics14020333), 2022-01-30
Supplement: s1 [file s1]

# Supplementary Materials: Deep Eutectic Solvents for Improving the Solubilization and Delivery of Dapsone

Sonia Trombino, Carlo Siciliano, Debora Procopio, Federica Curcio, Annarita S. Laganà, Di Gioia Maria Luisa, and Cassano Roberta

**Table S1.** Experimental POM images of the prepared DESs.

| DESs   | HBA | HBD | HBA/HBD molar ratio | Aspect                                       | POM images                                                                           |
|--------|-----|-----|---------------------|----------------------------------------------|--------------------------------------------------------------------------------------|
| CC:AA  | CC  | AA  | 2:1                 | Viscous yellow liquid                        | 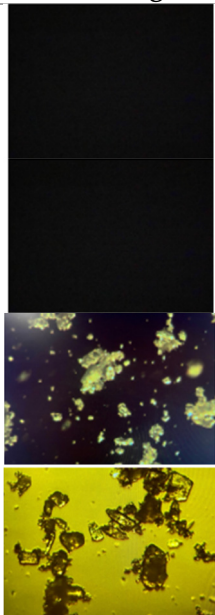 |
| CC:PG  | CC  | PG  | 1:3                 | Transparent liquid                           |                                                                                      |
| CC:DAP | CC  | DAP | 1:1                 | Viscous liquid that rapidly solidified at rt |                                                                                      |
|        |     |     | 1:2                 | Solid                                        |                                                                                      |

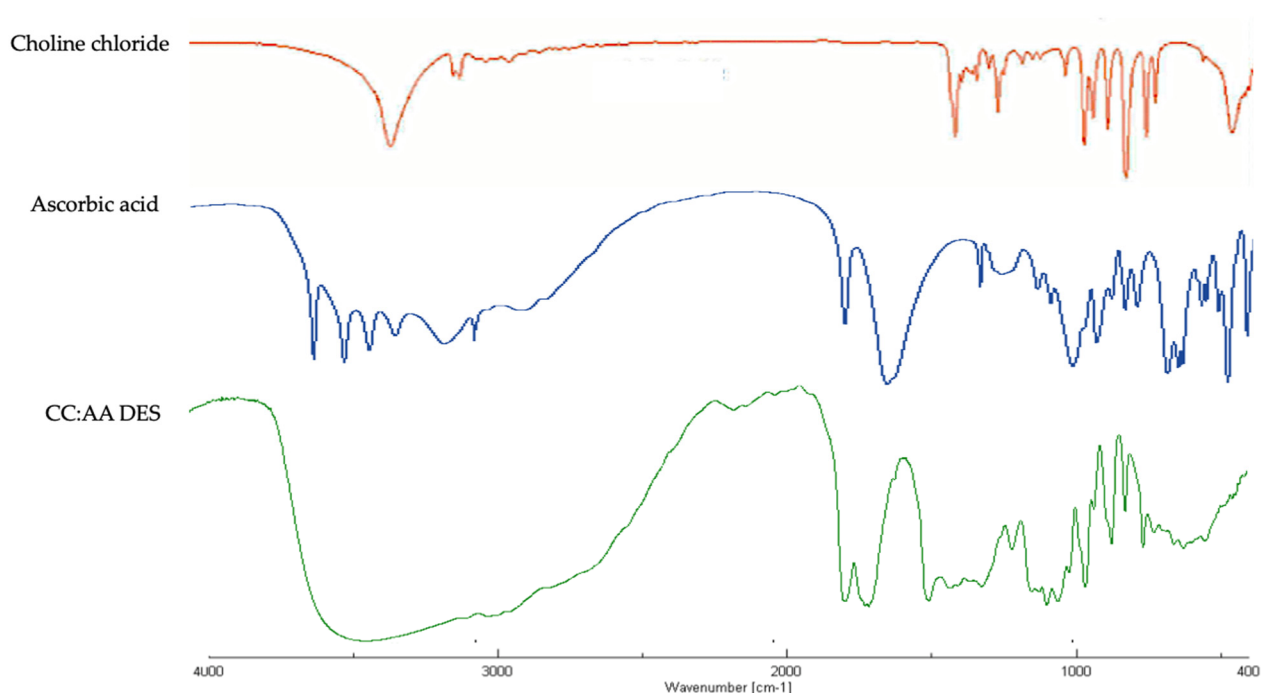

**Figure S1.** FTIR spectra of choline chloride, ascorbic acid and CC:AA DES (2:1).

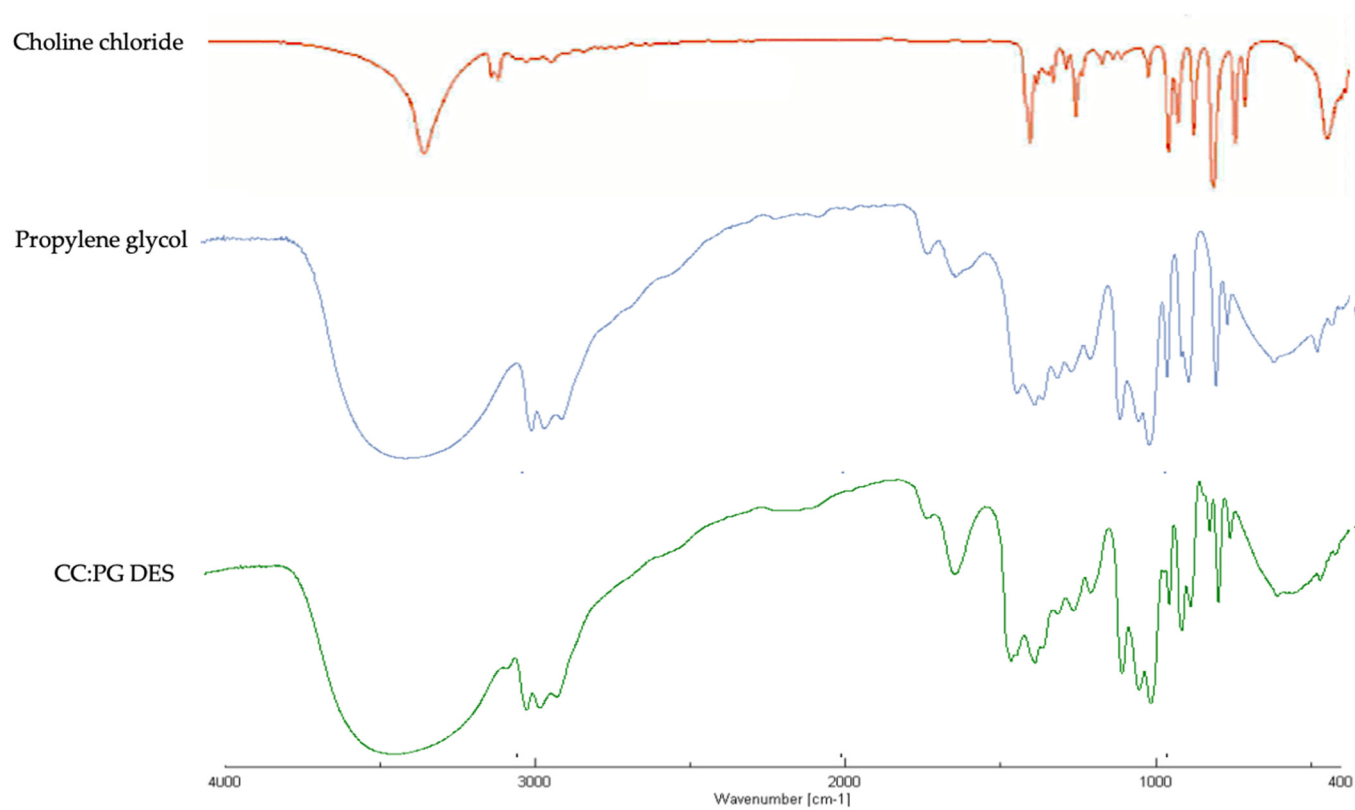

**Figure S2.** FTIR spectra of choline chloride, propylene glycol and CC:PG DES (1:3).

**a**

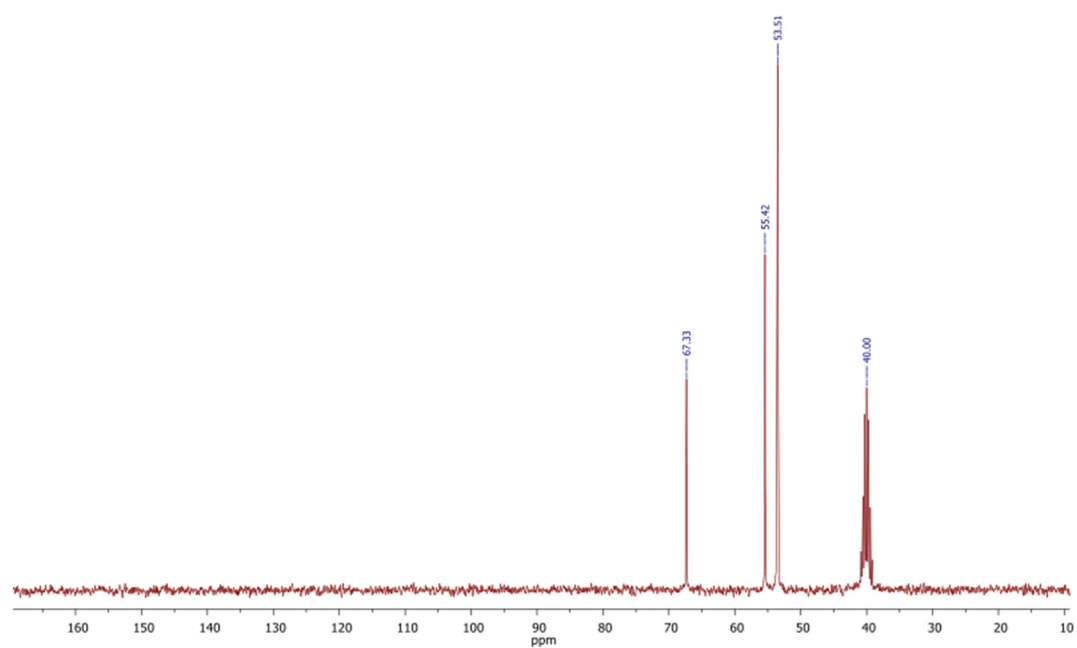

**b**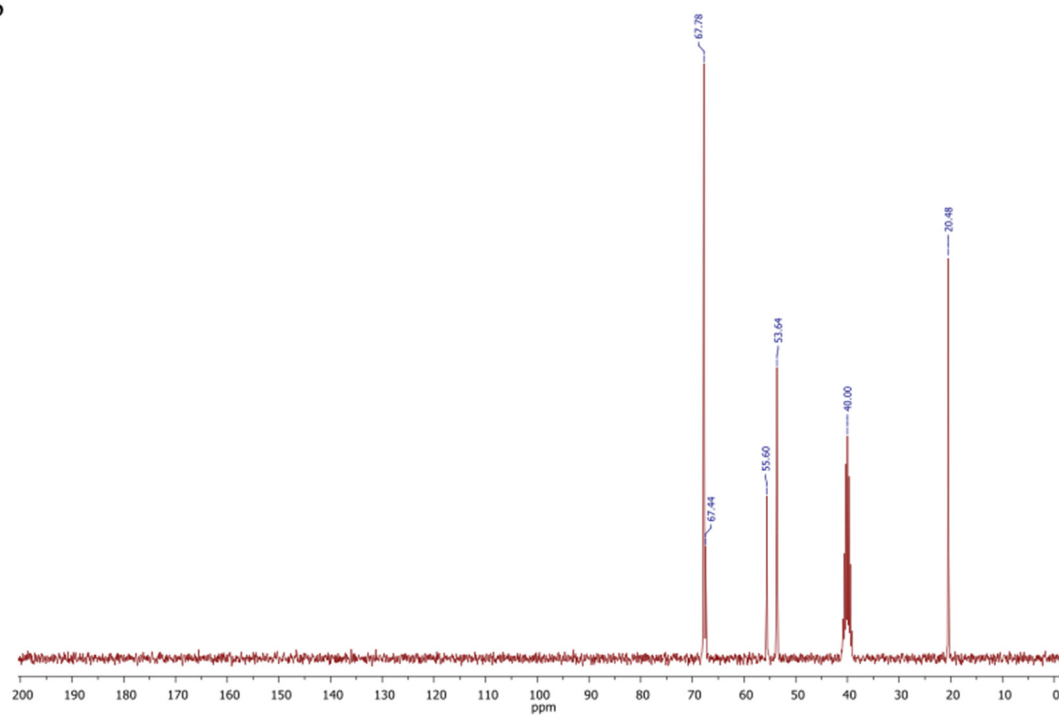**c**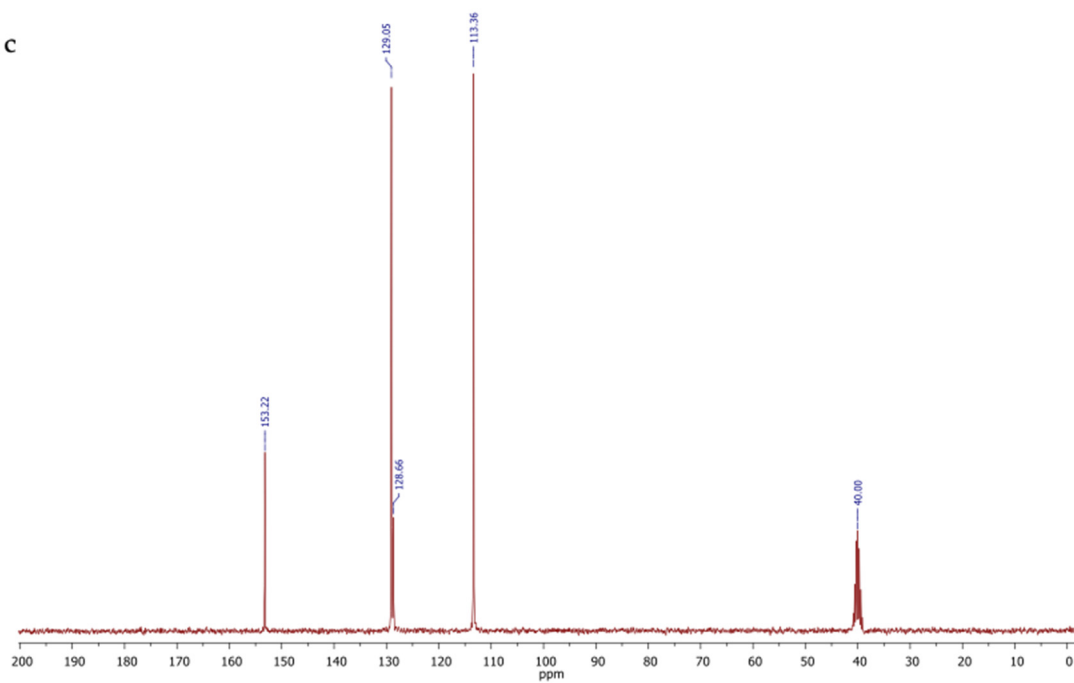

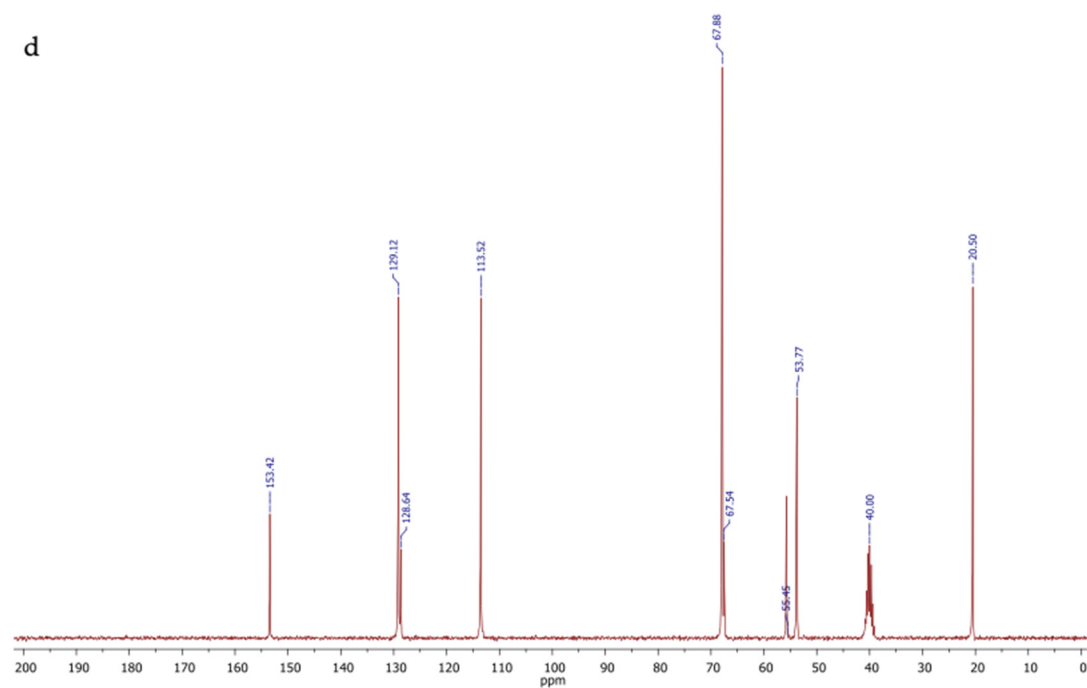

**Figure S3.**  $^{13}\text{C}$  NMR spectra of choline chloride (a), dapsone (b), ChCl-PG DES (c) and DES-DAP ternary system (d).

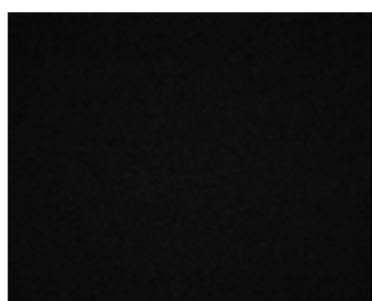

100 mg DAP  
+  
CC:AA DES

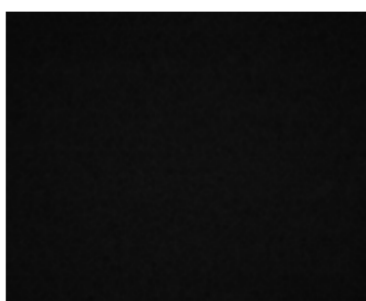

500mg DAP  
+  
CC:PG DES

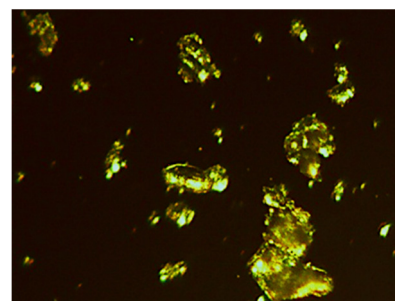

500 mg DAP  
+  
PROPYLENE GLYCOL

**Figure S4.** POM images of (DRUG + PG) and (DRUG + DESs) at rt.

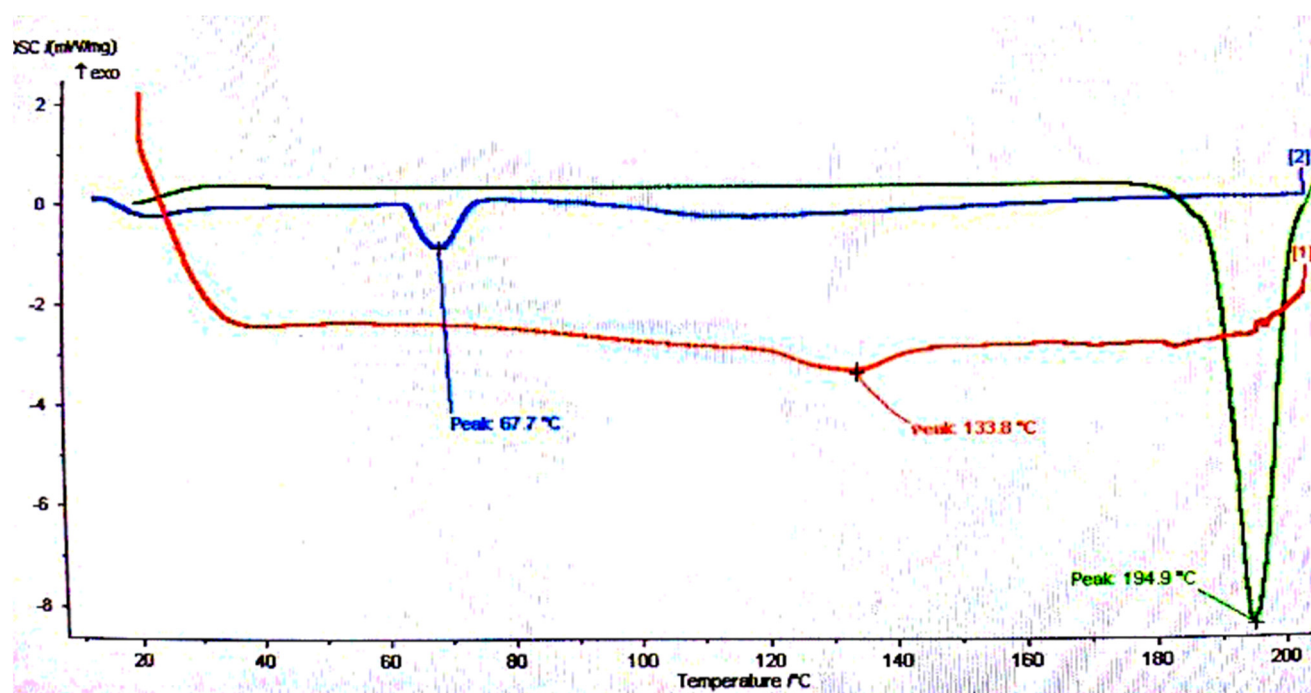

Figure S5. DSC thermograms of (1) CC:AA DES, (2) pure CC and (3) pure AA.
